# Supplementary material for: Systemic Neutrophil Gelatinase-Associated Lipocalin Alterations in Chronic Pancreatitis: A Multicenter, Cross-Sectional Study
Source: PubMed Central journal article supplement — Clin Transl Gastroenterol. 2024 Apr 25;15(4):e00686. doi: 10.14309/ctg.0000000000000686 (PMC11042777; doi:10.14309/ctg.0000000000000686), 2024-04-25
Supplement: ct9-15-e00686-s001.pdf [file ct9-15-e00686-s001.pdf]

**Supplementary Figures and Tables for:**

**Systemic Neutrophil Gelatinase-Associated Lipocalin Alterations in Chronic Pancreatitis: A Multicenter, Cross-Sectional Study**

**Kristyn Gumpper-Fedus<sup>1,2</sup>, Kaylin Chasser<sup>1,2</sup>,** Valentina Pita-Grisanti<sup>2,3</sup>, Molly Torok<sup>1,2</sup>, Timothy Pfau<sup>1,2</sup>, Thomas A. Mace<sup>1,2</sup>, Rachel M. Cole<sup>4</sup>, Martha A. Belury<sup>4</sup>, Stacey Culp<sup>5</sup>, Phil A. Hart<sup>1,2</sup>, Somashekar G. Krishna<sup>1,2</sup>, Luis F. Lara<sup>1</sup>, Mitchell L. Ramsey<sup>1</sup>, William Fisher<sup>6</sup>, Evan L. Fogel<sup>7</sup>, Chris E. Forsmark<sup>8</sup>, Liang Li<sup>9</sup>, Stephen Pandol<sup>10</sup>, Walter G. Park<sup>11</sup>, Jose Serrano<sup>12</sup>, Stephen K. Van Den Eeden<sup>13</sup>, Santhi Swaroop Vege<sup>14</sup>, Dhiraj Yadav<sup>15</sup>, Darwin L. Conwell<sup>16</sup>, and Zobeida Cruz-Monserrate<sup>+1,2</sup>, on behalf of the Consortium for the Study of Chronic Pancreatitis, Diabetes, and Pancreatic Cancer (CPDPC)

*\*Both authors contributed equally*

| <b>Disease State</b>                 | <b>Inclusion Criteria</b>                                                                                                                                                                                                                                                                                            | <b>Exclusion Criteria</b>                                                                                                                                                                                                                                                                                                                                                                                                                                                                                                    |
|--------------------------------------|----------------------------------------------------------------------------------------------------------------------------------------------------------------------------------------------------------------------------------------------------------------------------------------------------------------------|------------------------------------------------------------------------------------------------------------------------------------------------------------------------------------------------------------------------------------------------------------------------------------------------------------------------------------------------------------------------------------------------------------------------------------------------------------------------------------------------------------------------------|
| Control                              |                                                                                                                                                                                                                                                                                                                      | <ul style="list-style-type: none"> <li>• History of pancreatic disease</li> <li>• Upper abdominal symptoms</li> <li>• Family history of pancreatic disease, celiac disease, or cystic fibrosis</li> </ul>                                                                                                                                                                                                                                                                                                                    |
| <b>For All Pancreatitis Subjects</b> |                                                                                                                                                                                                                                                                                                                      |                                                                                                                                                                                                                                                                                                                                                                                                                                                                                                                              |
| AP                                   | <ul style="list-style-type: none"> <li>• One documented attack of AP in the prior 18 months</li> <li>• Imaging evidence of AP on CT scan or MRI/MRCP</li> <li>• Cambridge grade &lt;3 on CT scan or MRI/MRCP</li> <li>• &lt;50% pancreatic necrosis (if present)</li> <li>• No prior pancreatic surgery</li> </ul>   | <ul style="list-style-type: none"> <li>• History of autoimmune or traumatic pancreatitis</li> <li>• Presence of gallstones (AP and RAP only)</li> <li>• A sentinel attack of acute necrotizing pancreatitis which results in suspected disconnected duct syndrome</li> <li>• Primary pancreatic tumors</li> <li>• Pancreatic metastases from other malignancies</li> <li>• Known isolated EPD in the absence of any eligible inclusion criteria</li> <li>• Abnormal creatinine or renal failure (AP and RAP only)</li> </ul> |
| RAP                                  | <ul style="list-style-type: none"> <li>• 2 or more attacks of AP</li> <li>• Cambridge grade &lt;3 on CT scan or MRI/MRCP</li> <li>• No prior pancreatic surgery</li> </ul>                                                                                                                                           |                                                                                                                                                                                                                                                                                                                                                                                                                                                                                                                              |
| CP                                   | <ul style="list-style-type: none"> <li>• Cambridge grade 3-4 and/or parenchymal or ductal calcifications by CT scan or MRI/MRCP</li> </ul> <p>OR</p> <ul style="list-style-type: none"> <li>• Pancreatic histology diagnostic of CP including findings of fibrosis, chronic inflammation, and acinar loss</li> </ul> |                                                                                                                                                                                                                                                                                                                                                                                                                                                                                                                              |

**Supplemental Table 1: Inclusion and Exclusion Criteria.** Criteria established at the beginning of the biobanking studies whose samples were used for the current study. (modified from Yadav D. et al. 2018)

| <b>Metal Label</b> | <b>Bead</b>        | <b>Clone</b>               |
|--------------------|--------------------|----------------------------|
| Rh103Di            | Live Dead          | Cell-ID Intercalator-103Rh |
| Xe131Di            | Control Bead       |                            |
| Cs133Di            | Control Bead       |                            |
| Ce140Di            | Control Bead       |                            |
| Sm147Di            | CD11c              | Bu15                       |
| Eu151Di            | CD161              | HP-3G10                    |
| Eu153Di            | CD25_IL-2Ra        | BC96                       |
| Sm154Di            | CD27               | O323                       |
| Gd156Di            | CD183_CXCR3        | G025H7                     |
| Ho165Di            | CD33               | WM53                       |
| Lu175Di            | Control Bead       |                            |
| Ir191Di            | DNA1               | DNA                        |
| Ir193Di            | DNA2               | DNA                        |
| Ce142Di            | Control Bead       |                            |
| Nd148Di            | CD16               | 3G8                        |
| Sm152Di            | CD194_CCR4         | L291H4                     |
| Er167Di            | CD197_CCR7         | G043H7                     |
| Pr141Di            | CD196_CCR6         | G034E3                     |
| Nd143Di            | CD123_IL-3R        | 6H6                        |
| Nd144Di            | CD19               | HIB19                      |
| Nd145Di            | CD4                | RPA-T4                     |
| Sm149Di            | CD45RO             | UCHL1                      |
| Gd155Di            | CD57               | HCD57                      |
| Gd158Di            | CD185_CXCR5        | J252D4                     |
| Tb159Di            | NGAL               | EPR19912                   |
| Gd160Di            | CD28               | CD28.2                     |
| Dy164Di            | TCR $\gamma\delta$ | B1                         |
| Er166Di            | CD294              | BM16                       |
| Er168Di            | CD14               | 63D3                       |
| Er170Di            | CD3                | UCHT1                      |
| Yb172Di            | CD66b              | G10F5                      |
| Yb174Di            | IgD                | IA6-2                      |
| Dy161Di            | CD38               | HB-7                       |
| Ba138Di            | Control Bead       |                            |
| Nd146Di            | CD8a               | RPA-T8                     |
| Nd150Di            | CD45RA             | HI100                      |
| Dy163Di            | CD56_NCAM          | NCAM16.2                   |
| Yb171Di            | CD20               | 2H7                        |
| Yb173Di            | HLA-DR             | LN3                        |
| Yb176Di            | CD127_IL-7Ra       | A019D5                     |
| BCKG190Di          | Control Bead       |                            |
| Sn120Di            | Control Bead       |                            |
| Pb208Di            | Control Bead       |                            |
| Pt195Di            | Control Bead       |                            |
| Pt194Di            | Control Bead       |                            |
| Pt198Di            | Control Bead       |                            |
| I127Di             | Control Bead       |                            |
| Bi209Di            | CD11b              | ICRF44                     |
| Y89Di              | CD45               | HI30                       |

**Supplemental Table 2: CyTOF Antibody Panel.** The metal isotope labels, antibodies, and clones used with Maxpar Direct Immune Profiling Assay Kit.

| <b>PBMCs Populations and Subtypes</b>         | <b>Phenotype</b>                    |
|-----------------------------------------------|-------------------------------------|
| <b>T cells</b>                                | CD3+CD45+                           |
| αβ T cells                                    | CD3+CD45+TCRgd-                     |
| CD8+                                          | CD3+TCRgd-CD4-CD8+                  |
| Naïve                                         | CCR7+CD45RA+                        |
| Central Memory                                | CCR7+CD45RA-                        |
| Effector Memory                               | CCR7-CD45RA-                        |
| Terminal Effector                             | CCR7-CD45RA+                        |
| Activated                                     | CD38+HLADR+                         |
| CD4+                                          | CD3+TCRgd-CD4+CD8-                  |
| Naïve                                         | CCR7+CD45RA+                        |
| Central Memory                                | CCR7+CD45RA-                        |
| Effector Memory                               | CCR7-CD45RA-                        |
| Terminal Effector                             | CCR7-CD45RA+                        |
| Activated                                     | CD38+HLADR+                         |
| T regulatory                                  | CD4+CCR4+CD25+CD127-                |
| Naïve                                         | CD45RA+CD45RO-                      |
| Activated                                     | HLADR+                              |
| Memory                                        | CD45RA-CD45RO-                      |
| Th1                                           | CXCR5-CXCR3+CCR6-                   |
| Th2                                           | CXCR5-CXCR3-CCR6-                   |
| Th17                                          | CXCR5-CXCR3-CCR6+                   |
| γδ T cells                                    | CD3+TCRgd+                          |
| <b>B cells</b>                                | CD19+CD3-                           |
| Naïve                                         | CD20+CD27-IgD+                      |
| Memory                                        | CD20+CD27+IgD-                      |
| Memory Resting                                | CD20+CD27+IgD+                      |
| Plasmablasts                                  | CD20-CD27+CD38+                     |
| <b>Natural Killer cells</b>                   | CD56+CD161+CD123-                   |
| CD16-                                         | CD16-                               |
| CD16+                                         | CD16+                               |
| <b>Monocytes</b>                              | CD3-CD14+                           |
| Classical                                     | CD16-                               |
| Non-classical                                 | CD16+                               |
| <b>Dendritic Cells</b>                        | CD19-CD3-HLADR+CD56-                |
| Plasmacytoid                                  | CD16-CD123+CD11c-                   |
| Myeloid                                       | CD16-CD123-CD11c+                   |
| <b>Neutrophils</b>                            | CD66b+CD294-CD16+                   |
| <b>Eosinophils</b>                            | CD66b+CD294+CD16-                   |
| <b>Basophils</b>                              | CD66b-CD123+CD294+                  |
| <b>Monocytic myeloid derived stem cell</b>    | CD66b-CD20-CD19-CD3-<br>CD14+CD11b+ |
| <b>Granulocytic myeloid derived stem cell</b> | CD66b+CD11b+                        |

**Supplemental Table 3: PBMC Population Hierarchy and Phenotypic Markers.** Hierarchy of immune populations and subpopulations analyzed, and the phenotypic markers used for manual gating.

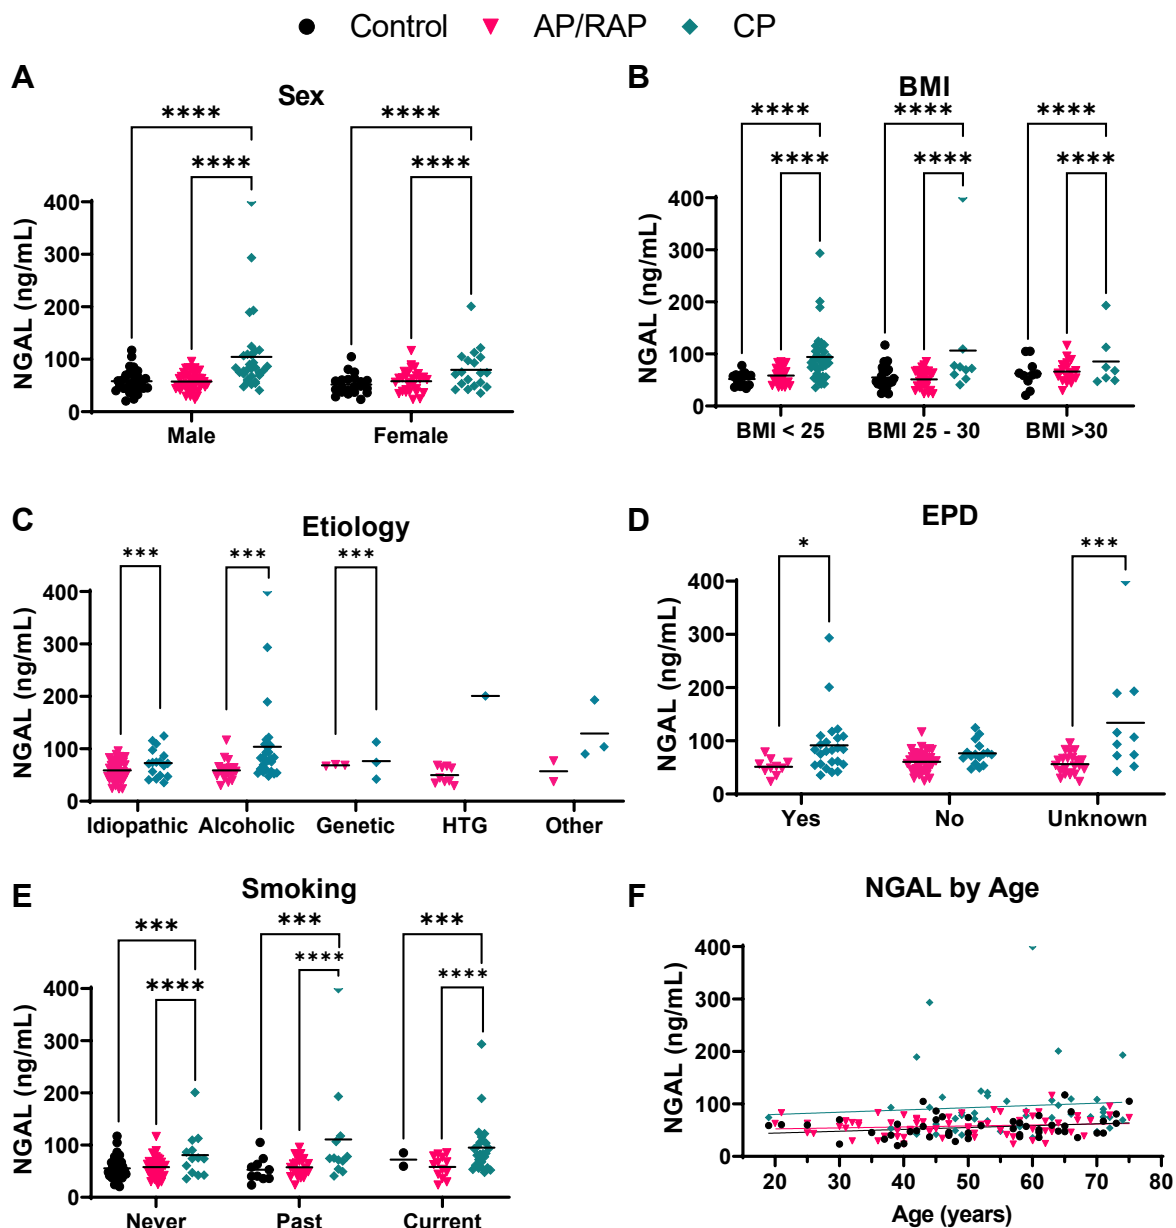

**Supplemental Figure 1: NGAL expression is not affected by many clinical characteristics in subjects with CP.** Samples were subdivided by (A) sex, (B) BMI, (C) etiology of pancreatitis, (D) EPD, (E) history of smoking and compared for plasma NGAL concentration, and (F) age. Statistical significance was determined by 2-way ANOVA with Tukey's multiple testing correction or correlation slope analysis for age. \* $p < 0.05$ , \*\*\* $p < 0.001$ , \*\*\*\* $p < 0.0001$ .

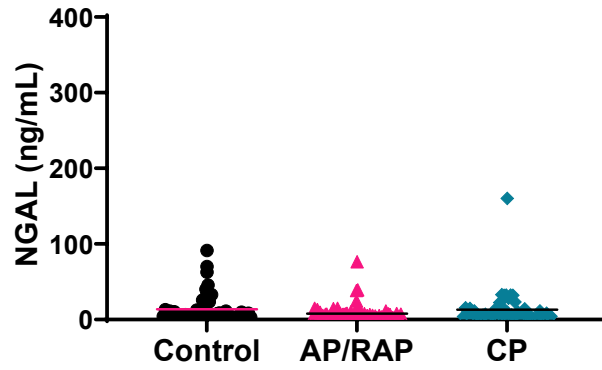

**Supplemental Figure 2: NGAL expression does not change in the urine of subjects with CP.** NGAL measured by ELISA from urine from the same subjects as the plasma samples in the PROCEED study set

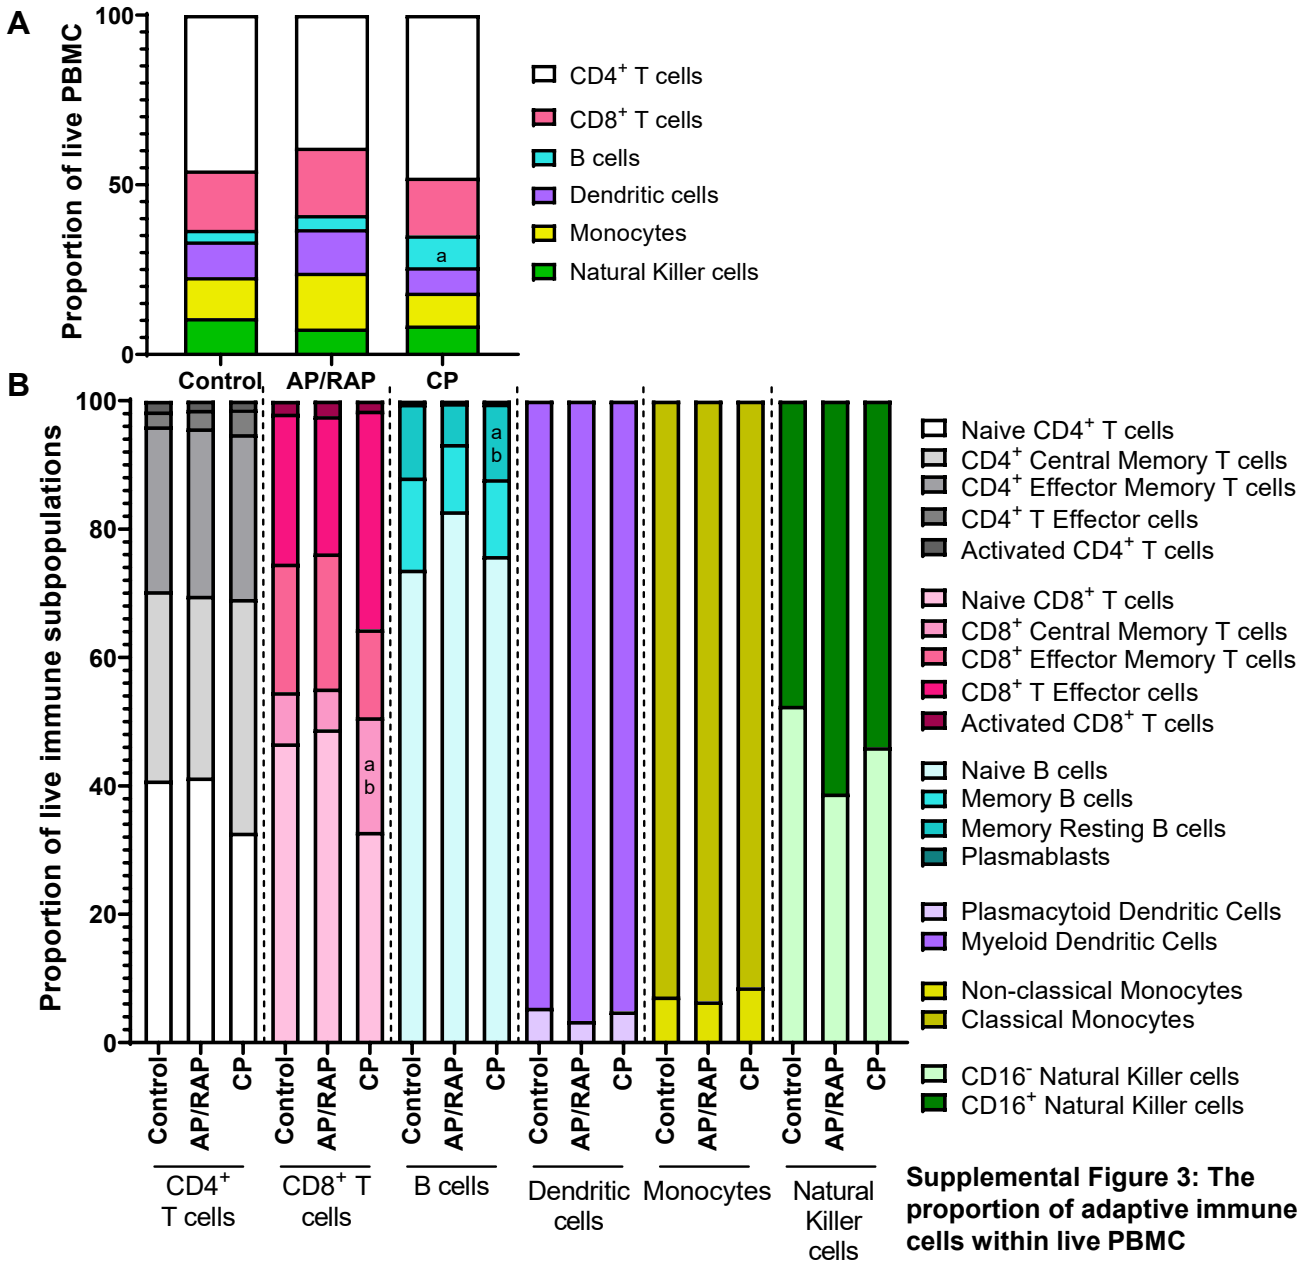

**Supplemental Figure 3: The proportion of adaptive immune cells within live PBMC populations and subsets increase in CP subjects.** PBMCs from PROCEED (healthy controls, AP/RAP, and CP subjects) collected during enrollment visit were analyzed by CyTOF. **(A)** Proportion of major immune populations and **(B)** subpopulations. a –  $P < 0.05$  between control and CP; b –  $P < 0.05$  between AP/RAP and CP; c –  $P < 0.05$  between control and AP/RAP

**Supplemental Table 6: Multiple logistic regressions containing the percent of live PBMC subpopulations.**

| <b>% of live PBMCs</b>                  | <b>Odds Ratio</b> | <b>95% CI</b> | <b>P-value</b> | <b>AUC</b>       |
|-----------------------------------------|-------------------|---------------|----------------|------------------|
| <b>Control vs. CP</b>                   |                   |               |                | <b>0.883****</b> |
| Intercept                               | 0.07              | 0.002 – 1.10  | 0.090          |                  |
| CD8 <sup>+</sup> central memory T cells | 1.50              | 1.14 – 2.26   | 0.015          |                  |
| Memory resting B cells                  | 0.82              | 0.60 – 0.95   | 0.115          |                  |
| <b>AP/RAP vs. CP</b>                    |                   |               |                | <b>0.890****</b> |
| Intercept                               | 0.10              | 0.005 – 1.07  | 0.086          |                  |
| CD8 <sup>+</sup> central memory T cells | 1.48              | 1.16 – 2.11   | 0.046          |                  |
| Memory resting B cells                  | 0.79              | 0.58 – 0.96   | 0.008          |                  |
